# Supplementary material
Source: HighWire-hosted journal article supplement (https://jitc.bmj.com/content/2/1/23)

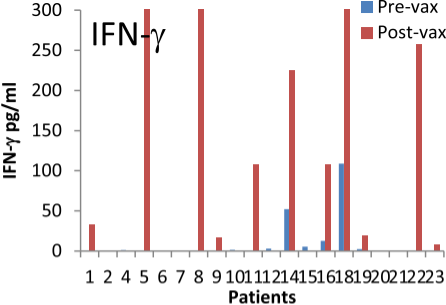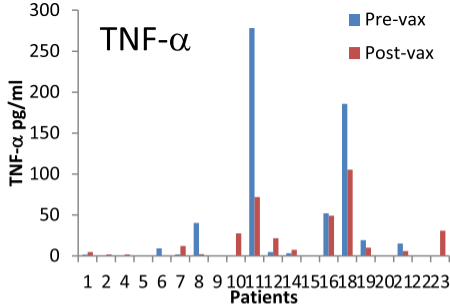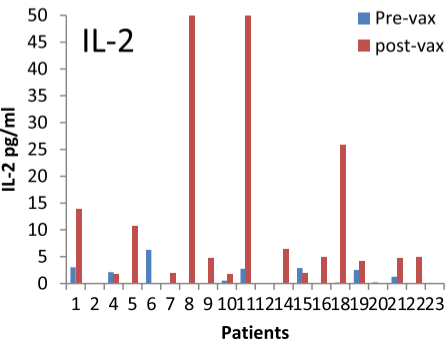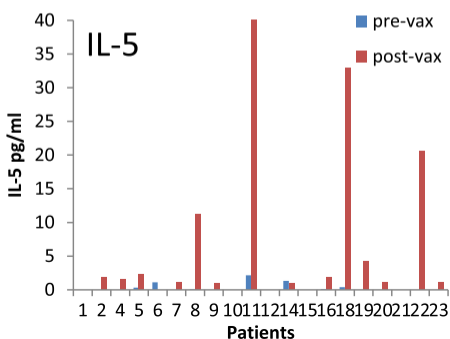

Supplement: media-2 [file media-2.pdf]

Patient 21 (Arm C)

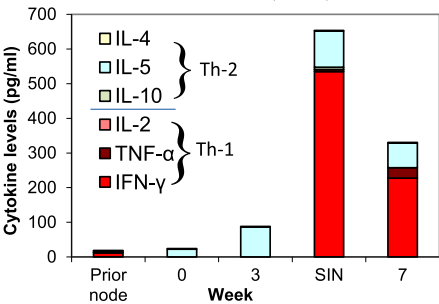

Patient 19 (Arm C)

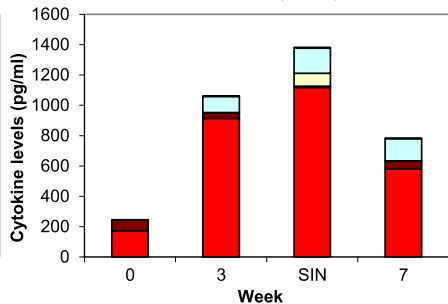

Patient 11 (Arm B)

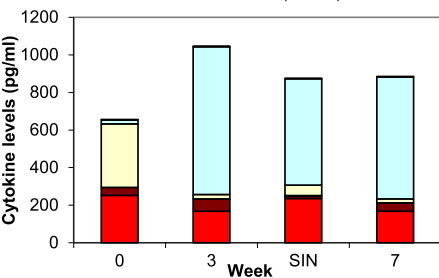

Patient 8 (Arm A)

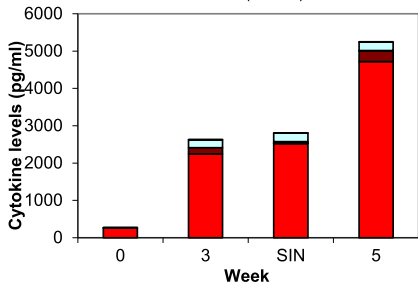

Patient 3 (Arm A)

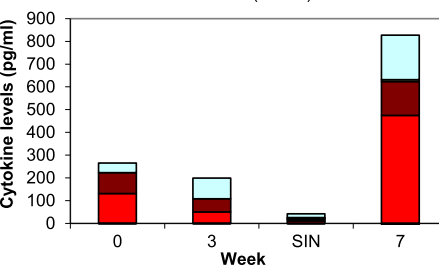

Patient 23 (Arm C)

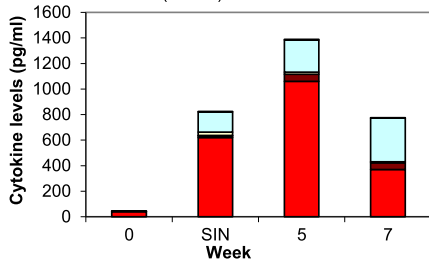

Supplement: media-3 [file media-3.pdf]

# Individual Cytokine Profile: 6MHP (minus bkgd) Medians by Disease State

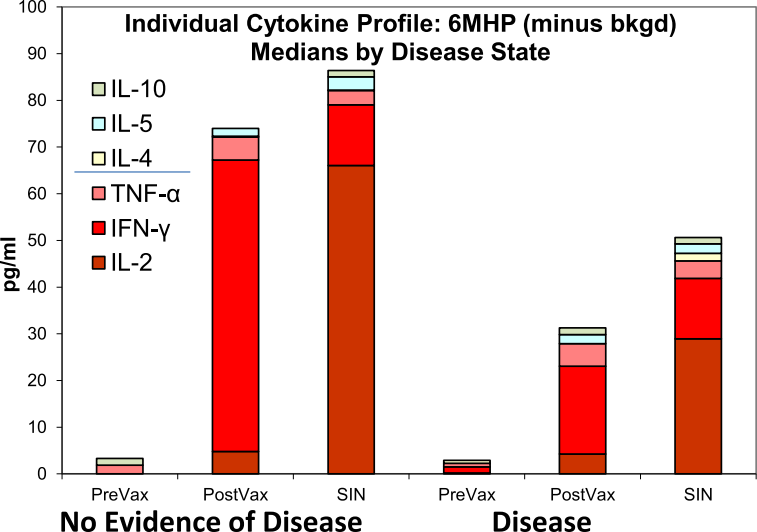

Supplement: media-4 [file media-4.pdf]
